# Supplementary material
Source: HighWire-hosted journal article supplement (https://openheart.bmj.com/content/5/1/e000766)
Supplement: inline-supplementary-material-1 [file inline-supplementary-material-1.docx]

Supplemental Table 1: Propensity scoring criteria. Clinical and procedural factors used in propensity matching study and control patients according to type of procedure.

| Variables Entered into Propensity Score Model | |
| --- | --- |
| Age | Sex |
| Creatinine | Body mass index |
| Chronic obstructive lung disease | Hypertension |
| Peripheral vascular disease | Myocardial infarction |
| NYHA functional class | Number of diseased vessels on angiography |
| Date of surgery | Urgency of surgery |
